# Supplementary material for: The Cortical and Striatal Gene Expression Profile of 100 Hz Electroacupuncture Treatment in 6-Hydroxydopamine-Induced Parkinson's Disease Model
Source: Evid Based Complement Alternat Med. 2012 Jan 26;2012:908439. doi: 10.1155/2012/908439 (PMC3272844; doi:10.1155/2012/908439)

**Table S1 Gene functional annotation for up-regulated transcripts by EA  
(profile B-a, b and c in Fig. 3)**

| EA-Targeted<br>Function                 | Name of sub-category                                           | p-value  | Number of<br>transcripts |
|-----------------------------------------|----------------------------------------------------------------|----------|--------------------------|
| <b>Cortex</b>                           |                                                                |          |                          |
| Protein<br>function and<br>Modification | Protein of unknown function DUF622                             | 6.33E-05 | 4                        |
|                                         | Ligase activity, forming carbon-nitrogen bonds                 | 2.58E-04 | 10                       |
|                                         | Small conjugating protein ligase activity (2)                  | 0.003215 | 7                        |
|                                         | Phosphoprotein                                                 | 3.99E-04 | 64                       |
|                                         | Acetylation                                                    | 0.003203 | 32                       |
|                                         | GTP binding (3)                                                | 2.77E-04 | 13                       |
|                                         | GTPase activity                                                | 0.005642 | 6                        |
|                                         | Small GTP-binding protein                                      | 0.008774 | 7                        |
|                                         | Nucleotide and                                                 | 0.004805 | 36                       |
|                                         | Nucleotide                                                     | 0.007939 | 5                        |
| metabolism                              | DNA recombination and DNA repair                               | 0.007939 | 5                        |
|                                         | Purine nucleotide metabolic process                            | 0.012207 | 8                        |
|                                         | Purine nucleotide biosynthetic process                         | 0.013449 | 7                        |
|                                         | Cytosol                                                        | 0.001331 | 26                       |
|                                         | Intracellular transport                                        | 0.003014 | 15                       |
|                                         | Synaptic vesicle                                               | 0.014385 | 5                        |
|                                         | Establishment of protein localization                          | 0.008444 | 15                       |
|                                         | Endomembrane system                                            | 0.00868  | 16                       |
|                                         | Integral to endoplasmic reticulum membrane                     | 0.010956 | 4                        |
|                                         | Zymogen granule                                                | 0.013286 | 3                        |
| <b>STR</b>                              |                                                                |          |                          |
| Cell signal                             | Repeat:TPR 10                                                  | 0.011438 | 2                        |
|                                         | Glycoprotein                                                   | 0.012100 | 14                       |
|                                         | Signal                                                         | 0.012629 | 12                       |
|                                         | Negative regulation of appetite or response to nutrient levels | 0.014925 | 2                        |

**Table S2 Gene functional annotation for down-regulated transcripts by  
EA (profile C-a, b and c in Fig. 3)**

| EA-Targeted<br>Function     | Name of sub-category                                                 | p-value  | Number of<br>transcripts |
|-----------------------------|----------------------------------------------------------------------|----------|--------------------------|
| <b>Cortex</b>               | Regulation of growth                                                 | 3.15E-04 | 14                       |
|                             | Regulation of cell proliferation                                     | 4.53E-04 | 22                       |
|                             | Regulation of organ growth                                           | 9.02E-04 | 5                        |
|                             | Organ regeneration                                                   | 0.001334 | 6                        |
|                             | Regeneration                                                         | 0.001347 | 8                        |
| Growth and<br>Proliferation | Negative regulation of smooth muscle<br>cell proliferation           | 0.001359 | 4                        |
|                             | Regulation of smooth muscle cell<br>proliferation                    | 0.001801 | 6                        |
|                             | Positive regulation of cell proliferation                            | 0.009080 | 13                       |
|                             | Regulation of cardiac muscle growth or<br>regulation of heart growth | 0.011956 | 3                        |
|                             | Mitotic cell cycle                                                   | 0.014662 | 9                        |
| Development                 | Tissue morphogenesis                                                 | 0.001449 | 11                       |
|                             | Tube development                                                     | 0.008710 | 10                       |
|                             | Positive regulation of multicellular<br>organismal process           | 0.008933 | 10                       |
|                             | Tyrosine protein kinase                                              | 0.001435 | 7                        |
|                             | Tyrosine protein kinase, active site                                 | 0.003738 | 6                        |
| Kinase                      | Protein tyrosine kinase activity                                     | 0.006982 | 7                        |
|                             | Kinase                                                               | 0.006915 | 15                       |
|                             | Protein kinase, core                                                 | 0.007412 | 12                       |
|                             | Cyclin-dependent protein kinase<br>holoenzyme complex                | 0.008807 | 3                        |
|                             | Positive regulation of immune system<br>process                      | 0.001700 | 11                       |
| Immune system               | Regulation of leukocyte activation                                   | 0.002042 | 9                        |
|                             | Positive regulation of lymphocyte<br>activation                      | 0.002505 | 7                        |
|                             | Positive regulation of alpha-beta T cell                             | 0.002654 | 4                        |

---

|                           |                                                                        |          |    |
|---------------------------|------------------------------------------------------------------------|----------|----|
|                           | differentiation                                                        |          |    |
|                           | Positive regulation of T cell activation                               | 0.003691 | 6  |
|                           | Positive regulation of immune response                                 | 0.003872 | 8  |
|                           | Regulation of lymphocyte activation                                    | 0.004346 | 8  |
|                           | Regulation of T cell activation                                        | 0.005101 | 7  |
|                           | Positive regulation of CD4-positive, alpha beta T cell differentiation | 0.010056 | 3  |
|                           | Regulation of adaptive immune response                                 | 0.012039 | 5  |
|                           | Positive regulation of B cell activation                               | 0.012058 | 4  |
|                           | Immunoglobulin-like fold                                               | 0.012693 | 11 |
|                           | Immunoglobulin subtype                                                 | 0.013768 | 8  |
|                           | T cell differentiation                                                 | 0.014101 | 5  |
|                           | Plasma membrane                                                        | 0.008638 | 42 |
| Cell adhesion             | Cell adhesion                                                          | 8.72E-04 | 17 |
|                           | Extracellular region                                                   | 0.002518 | 28 |
|                           | Protein complex binding                                                | 0.004429 | 10 |
|                           | Intracellular signaling cascade                                        | 0.005626 | 24 |
|                           | Extracellular region part                                              | 0.009106 | 17 |
|                           | Variant SH3                                                            | 0.009152 | 4  |
| Cell signal and Transport | Lipid transport                                                        | 0.007389 | 7  |
|                           | Lipid transporter activity                                             | 0.005452 | 5  |
|                           | DNA binding                                                            | 0.008310 | 31 |
|                           | Src homology-3 domain                                                  | 0.013131 | 7  |
|                           | Transcription factor activity                                          | 0.010139 | 18 |
|                           | Protein amino acid phosphorylation                                     | 0.014200 | 17 |
| <b>STR</b>                |                                                                        |          |    |
| Response to stimulus      | Response to endogenous stimulus                                        | 0.005533 | 7  |
|                           | Response to hormone stimulus                                           | 0.014925 | 6  |
| Proteinase                | Proteinase inhibitor or bait region or alpha-2-macroglobulin           | 0.013300 | 2  |

---

**Table S3 Gene functional annotation for regulated transcripts by EA**  
**( $p \leq 1$ , profile E-a in Fig. 3)**

| EA-Targeted<br>Function              | Name of sub-category                                 | p-value     | Number of<br>transcripts |
|--------------------------------------|------------------------------------------------------|-------------|--------------------------|
| <b>Cortex</b>                        |                                                      |             |                          |
| RNA and<br>Ribosome                  | Structural constituent of ribosome                   | 1.01E-17    | 30                       |
|                                      | Ribosome                                             | 1.10E-17    | 31                       |
|                                      | Ribonucleoprotein complex                            | 6.56E-16    | 35                       |
|                                      | Ribosomal subunit                                    | 6.65E-04    | 7                        |
|                                      | Cytosolic ribosome                                   | 0.004038    | 5                        |
|                                      | Large ribosomal subunit                              | 0.010777    | 4                        |
|                                      | Ribosomal small subunit biogenesis                   | 0.012186    | 3                        |
|                                      | RNA processing                                       | 0.020564    | 11                       |
|                                      | Cytoplasm                                            | 0.007598    | 29                       |
|                                      | Translation                                          | 8.09E-17    | 34                       |
| Protein and<br>protein<br>processing | Protein biosynthesis                                 | 5.87E-07    | 12                       |
|                                      | Translational elongation                             | 3.46E-05    | 9                        |
|                                      | Acetylation                                          | 4.06E-06    | 34                       |
|                                      | Phosphoprotein                                       | 0.003938    | 49                       |
|                                      | UBL conjugation                                      | 0.015003    | 9                        |
|                                      | Glyceraldehyde-3-phosphate<br>dehydrogenase activity | or 4.43E-05 | 6                        |
| Metabolism                           | Oxidoreductase activity                              |             |                          |
|                                      | Glucose metabolic process                            | 1.09E-04    | 11                       |
|                                      | Generation of precursor metabolites and<br>energy    | 0.004210    | 10                       |
|                                      | NAD or NADH binding                                  | 0.001092    | 7                        |
|                                      | Structural molecule activity                         | 1.88E-12    | 33                       |
| Structure                            | Intracellular non-membrane-bounded<br>organelle      | 2.52E-07    | 49                       |
| <b>STR</b>                           |                                                      |             |                          |
| Cell Signal                          | Neuropeptide signaling pathway                       | 1.69E-05    | 7                        |
|                                      | Neuropeptide                                         | 1.74E-04    | 5                        |
|                                      | Signal                                               | 1.77E-04    | 28                       |
| Secretion                            | Extracellular region                                 | 8.98E-04    | 22                       |

|             |                                           |          |    |
|-------------|-------------------------------------------|----------|----|
| Protein     | Secreted                                  | 9.94E-04 | 17 |
|             | Regulation of secretion                   | 0.011457 | 7  |
|             | Glycoprotein                              | 0.002002 | 30 |
|             | Compositionally biased region:Ser-rich    | 0.006704 | 6  |
|             | Glycosylation site:N-linked (GlcNAc...)   | 0.008202 | 28 |
|             | Epidermis or Ectoderm development         | 0.008123 | 5  |
| Development | Regulation of system process              | 0.011394 | 8  |
|             | Regulation of cellular localization       | 0.005438 | 8  |
|             | Regulation of muscle contraction          | 0.014215 | 4  |
|             | Regulation of neurological system process | 0.014887 | 6  |

**Table S4 Gene functional annotation for regulated transcripts by EA**  
**( $p \leq 1$ , profile E-b in Fig. 3)**

| EA-Targeted Function | Name of sub-category                                                | p-value  | Number of transcripts |
|----------------------|---------------------------------------------------------------------|----------|-----------------------|
| <b>Cortex</b>        |                                                                     |          |                       |
| Protein              | Basic leucine zipper                                                | 1.25E-04 | 4                     |
|                      | Basic-leucine zipper (bZIP) transcription factor                    | 2.08E-04 | 5                     |
|                      | CCAAT/enhancer-binding                                              | 3.06E-04 | 3                     |
|                      | Protein dimerization activity                                       | 0.005100 | 10                    |
|                      | Transcription factor activity                                       | 5.44E-04 | 13                    |
|                      | Transcription regulator activity                                    | 5.74E-04 | 17                    |
|                      | Sequence-specific DNA binding                                       | 9.94E-04 | 11                    |
|                      | Regulation of transcription from RNA polymerase II promoter         | 0.002696 | 12                    |
|                      | Regulation of transcription, DNA-dependent or RNA metabolic process | 0.003510 | 18                    |
|                      | DNA binding                                                         | 0.007374 | 17                    |
| Transcription        | Transcription activator activity                                    | 0.007890 | 7                     |
|                      | Transcription regulation                                            | 0.009472 | 11                    |
|                      | Transcription repressor activity                                    | 0.013137 | 6                     |
|                      | Positive regulation of developmental process                        | 0.001294 | 9                     |
|                      | Regulation of cell development                                      | 0.005380 | 7                     |
|                      | Embryonic placenta development                                      | 0.006989 | 4                     |
|                      | Cytoskeleton                                                        | 0.008597 | 3                     |
|                      | Positive regulation of cell differentiation                         | 0.007651 | 7                     |
|                      | Positive regulation of macromolecule metabolic process              | 0.010296 | 13                    |
|                      | Positive regulation of JAK-STAT cascade                             | 0.011649 | 3                     |
| Development          | Plasma membrane                                                     | 0.006914 | 24                    |
|                      | Extracellular region                                                | 0.014396 | 15                    |
|                      | Immune response                                                     | 0.007403 | 9                     |
| <b>STR</b>           |                                                                     |          |                       |
| Cell Signal          | Response to hormone or endogenous stimulus                          | 0.001222 | 10                    |

---

|             |                                                        |          |    |
|-------------|--------------------------------------------------------|----------|----|
|             | Cellular response to hormone stimulus                  | 0.006199 | 5  |
|             | Plasma membrane                                        | 0.001697 | 23 |
|             | Plasma membrane part                                   | 0.005853 | 15 |
|             | Phospholipid transport or lipid transporter activity   | 0.011272 | 3  |
|             | Response to organic substance                          | 0.007872 | 12 |
|             | Regulation of ossification                             | 0.008328 | 4  |
| Development | Positive regulation of macromolecule metabolic process | 0.009762 | 11 |

---

**Table S5 Primers used in real-time PCR**

| Gene name | GenBank _ID    | PCR fragment | Sequence of primers             |
|-----------|----------------|--------------|---------------------------------|
| GRIA2     | NM_017261.2    | nt2687-2768  | 5'-TACGGCATCGCCACACCTAA -3'     |
|           |                |              | 5'-AGACGCCTTGCTCACTGAGTTTC -3'  |
| NOS3      | NM_021838.2    | nt1064-1157  | 5'-GCGGCTGGTACATGAGTTCAGA-3'    |
|           |                |              | 5'-AGATCCATGCAGACAGCCACA-3'     |
| HRH4      | NM_131909.1    | nt325-504    | 5'-TGTGCACAGCATCCGTCTACAG-3'    |
|           |                |              | 5'-AAGAATCCGAAGCCAGAATCATTG-3'  |
| PRL       | NM_012629.1    | nt399-538    | 5'-CCAAGATCGTGAGTTTATTGCCAAG-3' |
|           |                |              | 5'-TCCAGGAGTGCACCAAAGTACG-3'    |
| OPRK1     | NM_017167.2    | nt609-704    | 5'-TCTGCATTTGGCTACTGGCATC-3'    |
|           |                |              | 5'-AGGAGCATTCAATGACATCCACA-3'   |
| OLR1078   | NM_207597.1    | nt281-382    | 5'-ATGCAGGATGCATTACCCAGA-3'     |
|           |                |              | 5'-GACAGATGGCTACGTAACGGTCATA-3' |
| OLR1523   | NM_001000713.1 | nt803-896    | 5'-ACAAAGCCGTGTCCATCAGCTAC-3'   |
|           |                |              | 5'-TTCATGGCTGCCTGCATCTC-3'      |
| PLA2G10   | NM_017176.1    | nt173-344    | 5'-CTCGATCGCCGATGGCTTA-3'       |
|           |                |              | 5'-TCCATGCACTTCCACGGGTA-3'      |

## **Figure Legends for Supplementary Materials**

**Figure S1 Dynamic Gene Network for genes in profile Aa-Af of Fig.3.** The Dynamic Gene Network of the cortex is presented in S1A and S1B. The blue dots indicate the differentially regulated genes. The lines show the relationships between genes. The solid line denotes positive regulation, and the dashed line denotes negative regulation. The size of the dots indicates the capability of the gene to interact with others. This capability was quantified by “degree” (refer to “Materials and Methods”). The larger the degree, the more genes interacted with the corresponding gene were and the more important this gene was in the network.

### Figure S1A

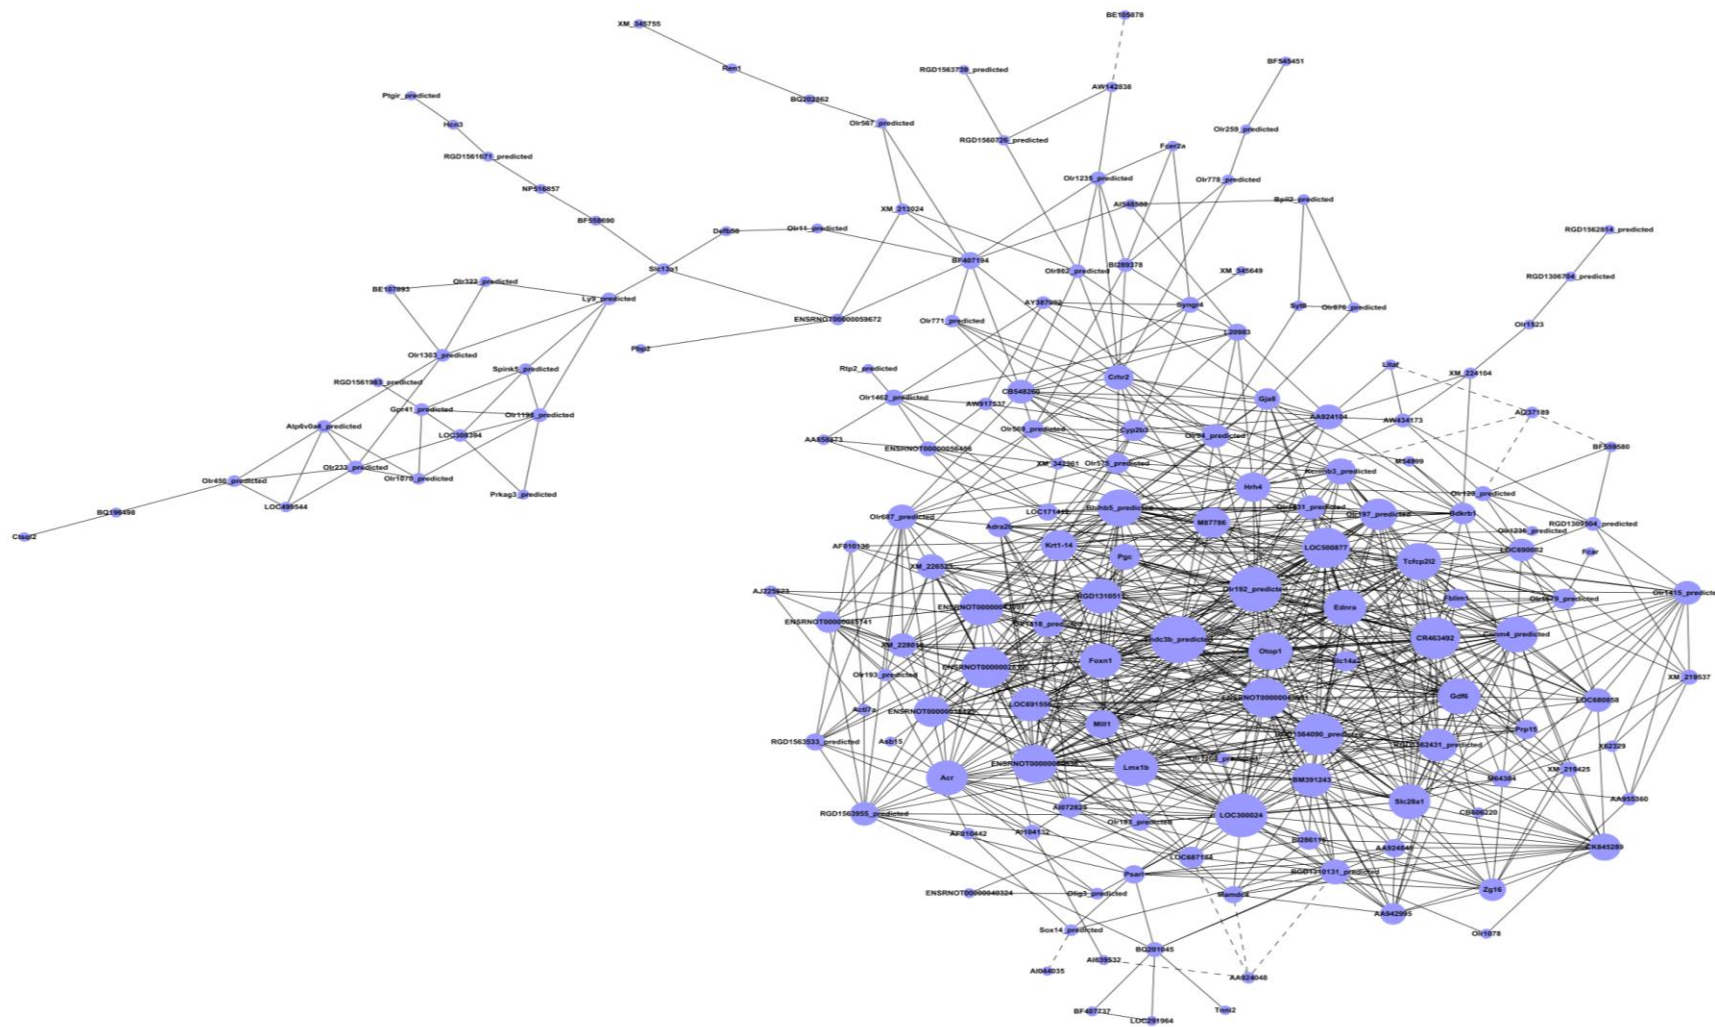

Figure S1B

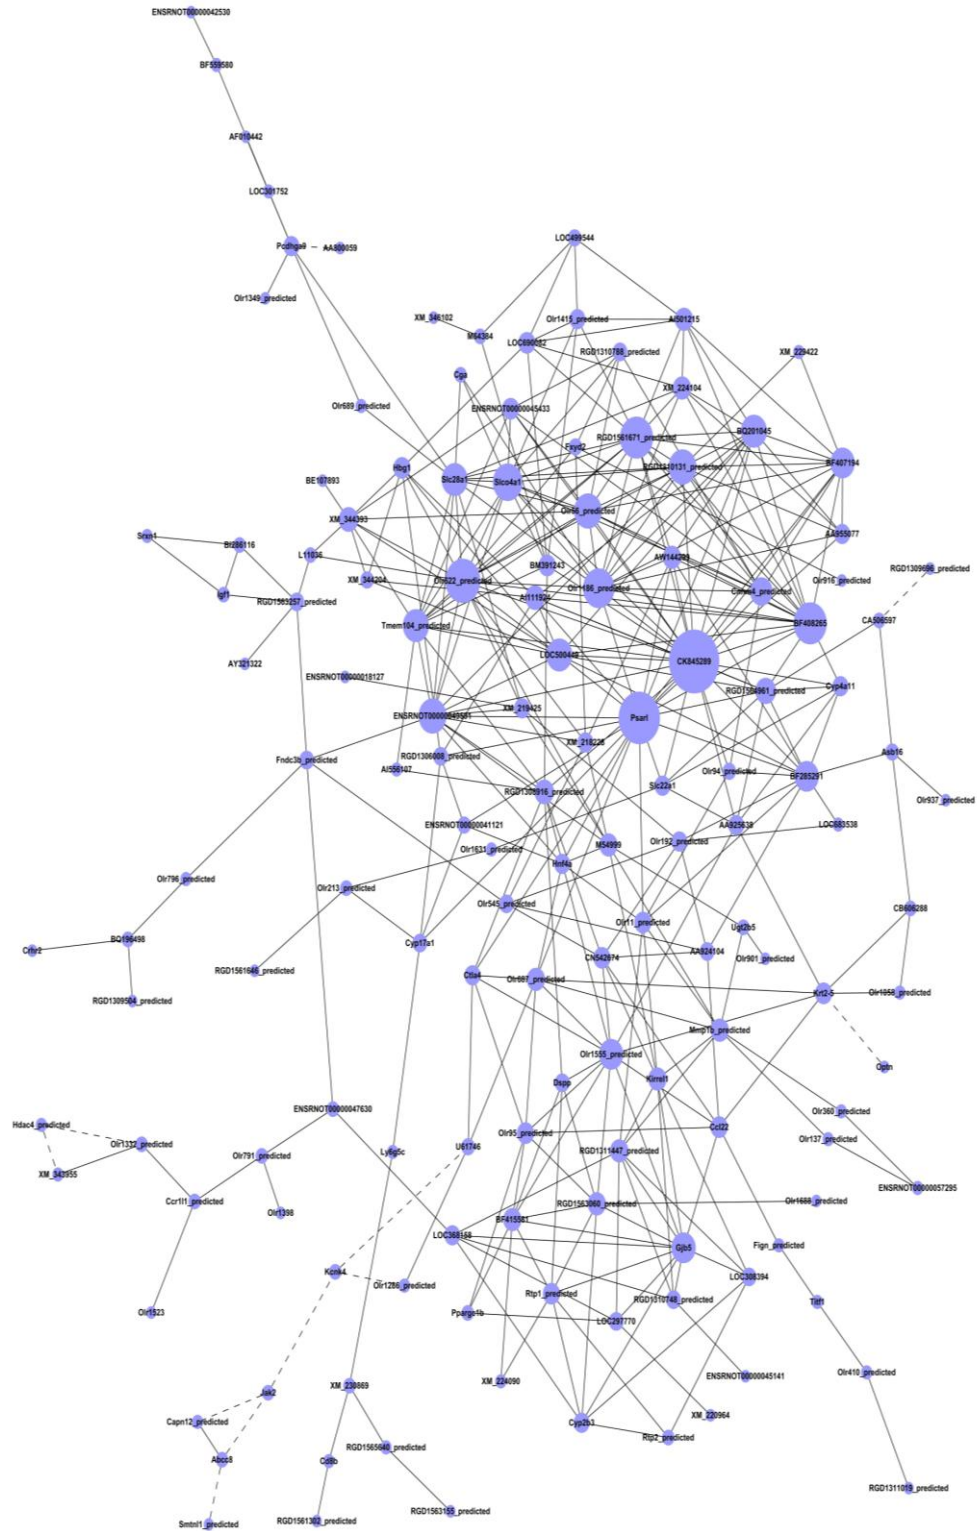

Supplement: Supplementary file 1 — Supplementary Materials include two parts: Tables (Table S1-S13) and Figure S1. Table S1 included the primers which were used in real-time PCR. The related functional categories of the transcripts regulated in 16 types profles in Figure 3 were listed in Tables S2–8. The mutual regulated transcripts in both the cortex and STR were listed in Table S9, and the mutual regulated functional categories in both the cortex and STR were listed in Table S10. If Log2 absolute (EA-Model) ≥ 1 and p < 0.05, the regulated transcripts were listed in Table S11. The results of pathway analysis for regulated transcripts by EA were listed in Table S12. And the corresponding functions of expressed products for some important transcripts (Discussion section) were listed in Table S13. The complete Dynamic Gene Network of the cortex and STR are presented in Figure S1. Figure Legends for Supplementary Materials: Figure S1 Dynamic Gene Network for genes in profile Aa-Af of Fig.3. The Dynamic Gene Network of the cortex is presented in S1A and S1B. The blue dots indicate the differentially regulated genes. The lines show the relationships between genes. The solid line denotes positive regulation, and the dashed line denotes negative regulation. The size of the dots indicates the capability of the gene to interact with others. This capability was quantified by “degree” (refer to “Materials and Methods”). The larger the degree, the more genes interacted with the corresponding gene were and the more important this gene was in the network. [file 908439.f1.pdf]
